# Supplementary material
Source: PubMed Central journal article supplement (PMC3697595)
Supplement: IAI.00013-13_zii999090202so1.pdf [file IAI.00013-13_zii999090202so1.pdf]

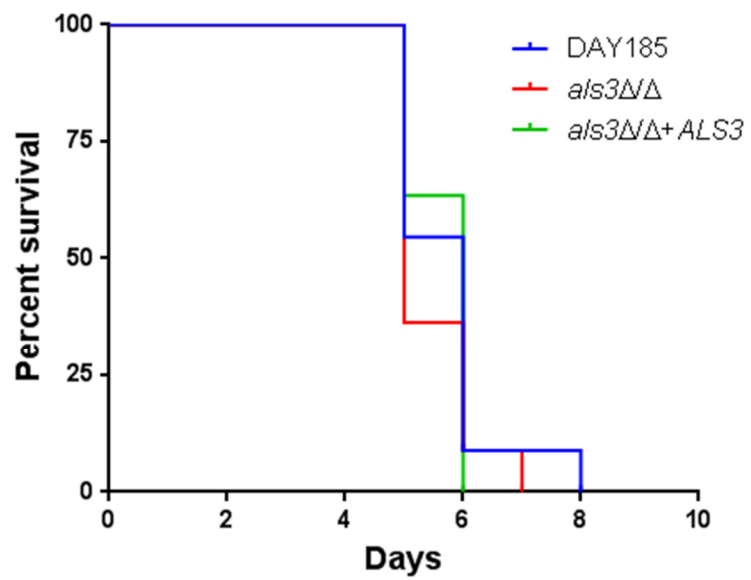

FIG S1 A *C. albicans als3Δ/Δ* null mutant has normal virulence in mice. Survival of mice infected intravenously with the indicated strains of *C. albicans*. Data are the results of 10-11 mice per strain of *C. albicans*.

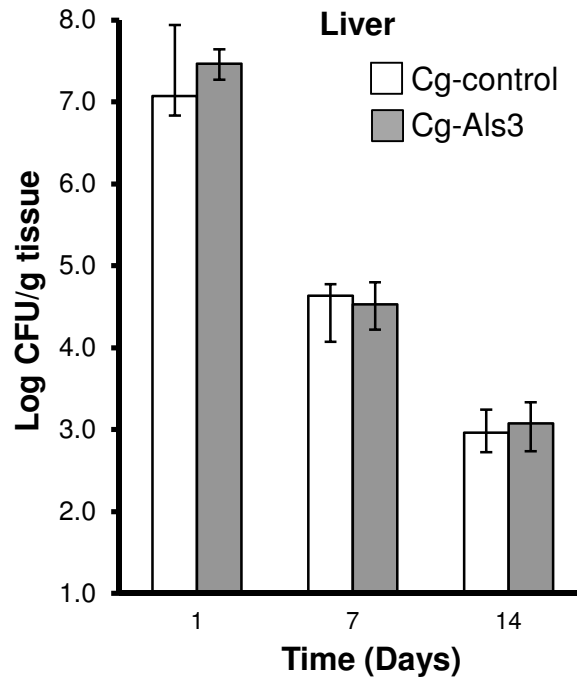

FIG S2 Expression of Als3 in *C. glabrata* does not affect liver fungal burden. Liver fungal burden of mice inoculated intravenously with *C. glabrata* expressing Als3 (Cg-Als3) or the wild-type control strain (Cg-control). Results are the median  $\pm$  interquartile range of 3 experiments, each consisting of 8 mice per strain of *C. glabrata*.
